# Supplementary material for: ICP AES determination of platinum group elements and gold in collective extract and strip product solution in analysis of geological samples
Source: Royal Society of Chemistry journal article supplement (doi:10.1039/b912849m), 2009-01-01
Supplement: b912849m.pdf [file b912849m.pdf]

## Supplementary materials

**Table 1** The conditions of the autoclave decomposition of raw materials and product of copper-nickel plant

| №   | Sample types, including standard samples                                     | Mass of sample/g | Acid mixture; volume/mL |                        |                    | T/°C |
|-----|------------------------------------------------------------------------------|------------------|-------------------------|------------------------|--------------------|------|
|     |                                                                              |                  | HCl                     | HNO <sub>3</sub>       | HF                 |      |
| I   | Dump slags                                                                   | 5; 10            | 25                      | 5                      | 10; 15             | 230* |
|     | Final tailings of impregnated ores                                           | 10               | 10                      | 30                     | 6                  | 240  |
|     | Enrichment tailings, HO-1                                                    | 5; 10            | 25                      | 1-5; 2-7               | 10-15; 15-18       | 230  |
| II  | Impregnated copper-nickel sulphide ores, VT-1, VP-2                          | 5                | 10                      | 30                     | 6                  | 240  |
|     | Lode copper-nickelsulphide ores, G-3                                         | 2; 5             | 10                      | 10                     | 4                  | 230  |
| III | Pirrotine concentrate                                                        | 2; 5             | 10; 20                  | 8; 20                  | 4; 10              | 230  |
|     | Copper concentrate, nickel concentrate, KN-1, KM-1; ore-melting stain, ShT-1 | 1; 2             | (6; 9) <sup>†</sup> 12  | (4; 5) <sup>†</sup> 12 | 1 <sup>†</sup> ; 4 | 200  |
|     | Nickel matte, FShT-30                                                        | 1; 2             | (6; 8) <sup>†</sup> 12  | (4; 5) <sup>†</sup> 12 | -                  | 200  |
|     |                                                                              |                  |                         |                        |                    |      |

\*Decomposition time 4 hr, for samples № 2 and 4 – 6 hr. <sup>†</sup>Two-chamber variant of the decomposition, HNO<sub>3</sub> is in reaction chamber, the sample with HCl and HF is in the insert.

**Table 2** Relative standard deviation of the determination of PGEs and gold in extract (I, II) and in strip product solution (II, IV) in the analysis of standard samples and process materials by ETAAS(I, II) and ICP-AES (III, IV) methods (n\*=3)

| №                                                                      | Pt             | Pd         | Rh         | Ru         | Au         | Ir        |
|------------------------------------------------------------------------|----------------|------------|------------|------------|------------|-----------|
| The range of metal contents in standard samples (µg g <sup>-1</sup> )  |                |            |            |            |            |           |
|                                                                        | 0.43–19        | 0.84–101   | 0.096–6.3  | 0.029–2.0  | 0.07–2.8   | 0.04–0.54 |
|                                                                        | S <sub>r</sub> |            |            |            |            |           |
| I                                                                      | 0.10–0.02      | 0.04–0.01  | 0.05–0.02  | 0.14–0.04  | 0.07–0.04  | 0.12–0.06 |
| II                                                                     | 0.12–0.03      | 0.12–0.02  | 0.13–0.07  | 0.13–0.03  | 0.11–0.03  | 0.17–0.06 |
| III                                                                    | 0.16–0.02      | 0.03–0.01  | 0.03; 0.02 | 0.07–0.04  | 0.04–0.02  | 0.13      |
| IV                                                                     | 0.13–0.04      | 0.07–0.02  | 0.13–0.04  | 0.12–0.04  | –          | –         |
| The range of metal contents in process materials (µg g <sup>-1</sup> ) |                |            |            |            |            |           |
|                                                                        | 0.42–7.6       | 1.17–23.4  | 0.021–0.62 | 0.022–0.27 | 0.039–1.37 | –         |
|                                                                        | S <sub>r</sub> |            |            |            |            |           |
| I                                                                      | 0.13–0.04      | 0.06–0.01  | 0.16–0.02  | 0.17–0.02  | 0.12–0.03  | –         |
| II                                                                     | 0.11–0.04      | 0.06–0.01  | 0.18–0.04  | 0.20–0.03  | 0.16–0.09  | –         |
| III                                                                    | 0.11–0.02      | 0.07–0.004 | –          | 0.17–0.02  | 0.17–0.01  | –         |
| IV                                                                     | 0.17–0.04      | 0.09–0.02  | –          | 0.19–0.07  | 0.11–0.08  | –         |

\*Number of replicates
